# Supplementary material for: Reaction-based fluorescent probe for the selective and sensitive detection of thiophenols with a large Stokes shift and its application in water samples
Source: Royal Society of Chemistry journal article supplement (doi:10.1039/c7an01994g), 2017-12-20
Supplement: c7an01994g1.pdf [file c7an01994g1.pdf]

## Electronic Supporting Information

### Reaction-based fluorescent probe for selective and sensitive detection of thiophenols with a large stokes shift and its application in water samples

Mengzhao Zhang <sup>a, b</sup>, Taohua Leng <sup>b, \*</sup>, Yongjia Shen <sup>a</sup>, Chengyun Wang <sup>a, \*</sup>

*a. Key Laboratory for Advanced Materials and Institute of Fine Chemicals, School of Chemistry and Molecular Engineering, East China University of Science and Technology, 130 Meilong Road, Shanghai 200237, P. R. China. E-mail: cywang@ecust.edu.cn.*

*b. Department of Chemistry, School of Chemistry and Molecular Engineering, East China University of Science and Technology, 130 Meilong Road, Shanghai 200237, P. R. China. E-mail: [length@sqi.org.cn](mailto:length@sqi.org.cn).*

#### Table of contents

##### Preparation of test solutions

**Table S1.** Comparison of determined detection limit with those of some literatures.

**Fig. S1.** <sup>1</sup>H NMR spectrum of compound **2** in DMSO-d<sub>6</sub>

**Fig. S2.** <sup>13</sup>C NMR spectrum of compound **2** in DMSO-d<sub>6</sub>

**Fig. S3.** <sup>1</sup>H NMR spectrum of Probe **1** in DMSO-d<sub>6</sub>

**Fig. S4.** <sup>13</sup>C NMR spectrum of Probe **1** in DMSO-d<sub>6</sub>

**Fig. S5.** HRMS spectrum of Probe **1**.

**Fig. S6.** Time course of Probe **1** (10 μM) upon addition of thiolphenol (20 μM) in DMSO–HEPES (V/V = 3 : 7, 50 mM, pH 7.4) solution. Slit width: 3/5 nm. λ<sub>ex</sub> = 454 nm.

**Fig. S7.** Time dependent fluorescence spectra of Probe **1** (10 μM) in the present of PhSH (50 μM) in different DMSO/HEPES buffer solution (30/70, 20/80, 10/90, 5/95, pH = 7.4, 50 mM). λ<sub>ex</sub> = 454 nm.

**Fig. S8.** Color changes of Probe **1** upon addition of different species under UV light (365 nm).

**Fig. S9.** Fluorescence responses of Probe **1** (10 μM) at 613 nm toward thiolphenol (20 μM) in the presence of some competitive species (100 μM) in DMSO–HEPES (V/V = 3 : 7, 50 mM, pH 7.4) solution. λ<sub>ex</sub> = 454 nm.

**Fig. S10.** HRMS spectrum of the reaction between Probe **1** and PhSH.

**Fig. S11.** Effect of pH on the fluorescence intensity at 613 nm of Probe **1** (10 μM) in DMSO–HEPES (V/V = 3 : 7, 50 mM, pH 7.4) solution with (●) and without (■) PhSH (20 μM). λ<sub>ex</sub> = 454 nm.

##### Preparation of test solutions:

---

\* Corresponding author. Tel./fax: +86-021-64252967; e-mail: [cywang@ecust.edu.cn](mailto:cywang@ecust.edu.cn); [length@sqi.org.cn](mailto:length@sqi.org.cn).

1. Preparation of probe solution: The solution of Probe **1** was prepared in DMSO at 0.2 mM. The test solution of the Probe **1** (10  $\mu$ M) in 3 mL HEPES buffer (50 Mm, pH 7.4) was prepared by placing 0.15 mL stock solution of Probe **1** (10  $\mu$ M) and 0.75 mL DMSO in 2.1 mL HEPES buffer.
2. Preparation of the solutions of various tested analytes: NaF, NaCl, NaBr, NaI, NaClO<sub>4</sub>, NaClO, NaHSO<sub>3</sub>, Na<sub>2</sub>SO<sub>3</sub>, Na<sub>2</sub>SO<sub>4</sub>, KCl, ZnCl<sub>2</sub>, FeCl<sub>3</sub>, AlCl<sub>3</sub>, CuCl<sub>2</sub>, HgCl<sub>2</sub>, CoCl<sub>2</sub> were prepared at 3 mM in distilled water. PhSH, p-NH<sub>2</sub>-PhSH, p-CH<sub>3</sub>-PhSH, p-NO<sub>2</sub>-PhSH, Hcy, Cys, GSH, (CH<sub>3</sub>)<sub>3</sub>SH, HOCH<sub>2</sub>CH<sub>2</sub>SH, NaSH, Na<sub>2</sub>S, C<sub>6</sub>H<sub>5</sub>NH<sub>2</sub>, C<sub>6</sub>H<sub>5</sub>OH were prepared at 3 mM in EtOH.

| Probe                                                                               | $\lambda_{\text{ex}}/\lambda_{\text{em}}$ (nm)<br>(stokes shift) | Response speed | Detection limit | Reference                                   |
|-------------------------------------------------------------------------------------|------------------------------------------------------------------|----------------|-----------------|---------------------------------------------|
| 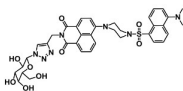  | 260/414<br>(154)                                                 | 5 s            | 3.8 nM          | Dyes Pigms 2015;<br>116: 52–57              |
| 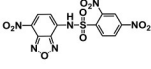 | 465/555<br>(90)                                                  | 20 min         | 2 $\mu$ M       | Chem Commun<br>2010; 46: 1944–1946          |
| 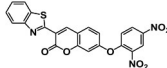 | 461/494<br>(33)                                                  | 30 min         | 1.8 nM          | Chem Commun<br>2010, 46, 1503–1505.         |
| 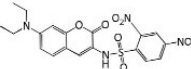 | 370/515<br>(145)                                                 | 15 min         | 150 nM          | Anal. Chem. 2014,<br>86, 8835 – 8841        |
| 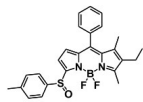 | 484/568<br>(84)                                                  | 30 min         | 0.74 $\mu$ M    | Org Biomol Chem.<br>2012; 10:<br>4689–4691. |
| 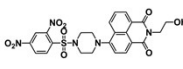 | 380/517<br>(137)                                                 | 3 min          | 10 nM           | J Mater Chem C<br>2015, 3, 8248–8254.       |
| 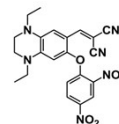 | 477/606<br>(129)                                                 | 2 min          | 8.2 nM          | J Mater Chem C<br>2016, 4, 4320–4326.       |
| 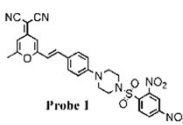 | 454/613<br>(159)                                                 | 15 min         | 8.3 nM          | This work                                   |

**Table S1.** Comparison of determined detection limit with those of some literatures.

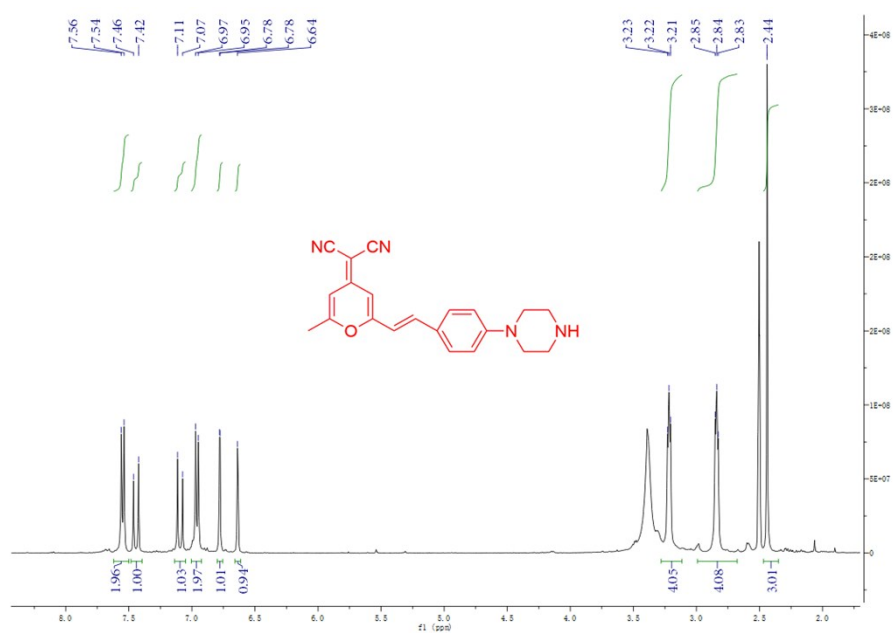

**Fig. S1.** <sup>1</sup>H NMR spectrum of compound **2** in DMSO-d<sub>6</sub>

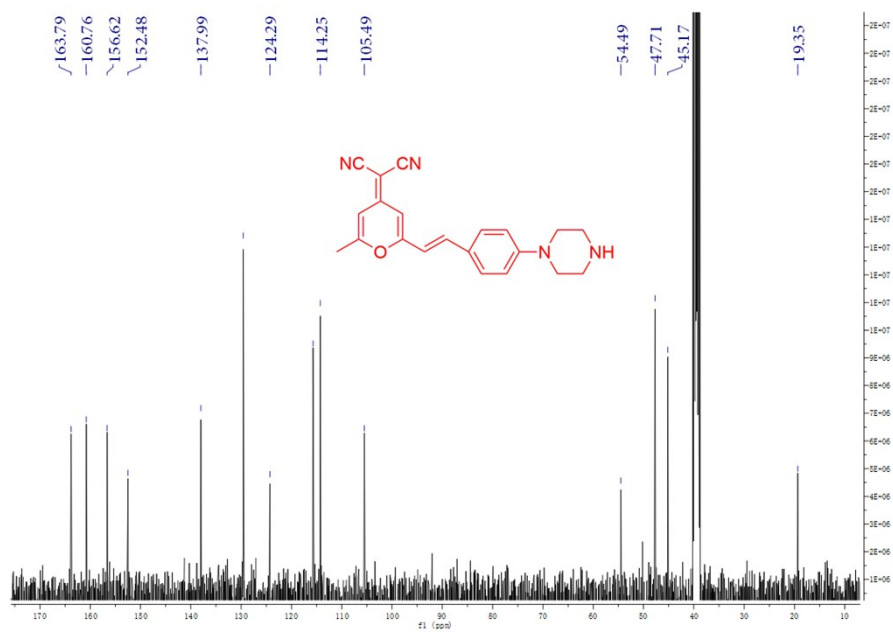

**Fig. S2.** <sup>13</sup>C NMR spectrum of compound **2** in DMSO-d<sub>6</sub>

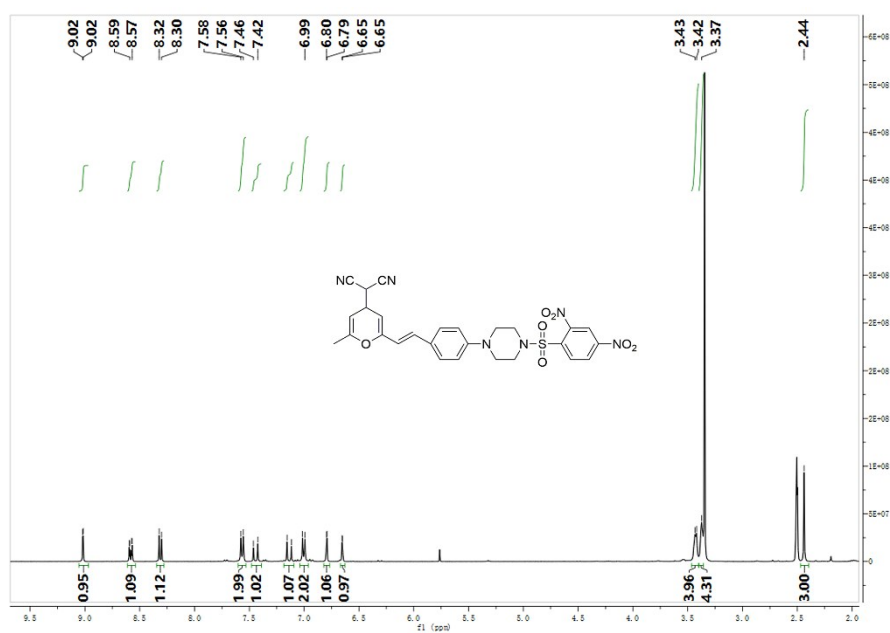

**Fig. S3.** <sup>1</sup>H NMR spectrum of Probe 1 in DMSO-d<sub>6</sub>

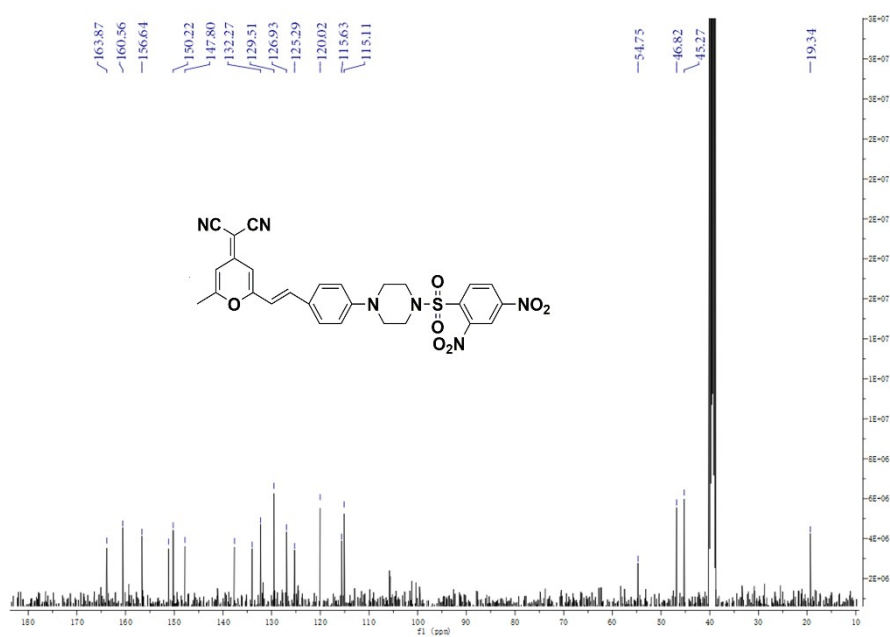

**Fig. S4.** <sup>13</sup>C NMR spectrum of Probe 1 in DMSO-d<sub>6</sub>

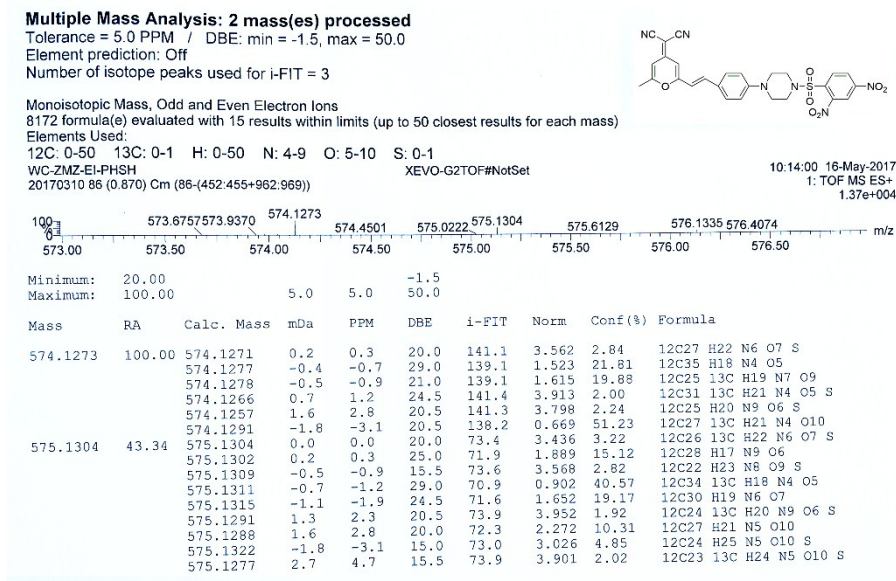

**Fig. S5.** HRMS spectrum of Probe 1.

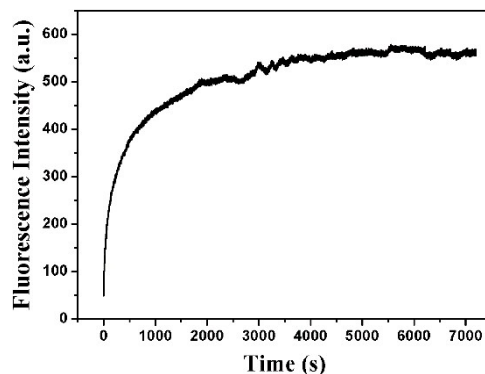

**Fig. S6.** Time course of Probe 1 (10  $\mu$ M) upon addition of thiolphenol (20  $\mu$ M) in DMSO-HEPES (V/V = 3 : 7, 50 mM, pH 7.4) solution. Slit width: 3/5 nm.  $\lambda_{\text{ex}}$  = 454 nm.

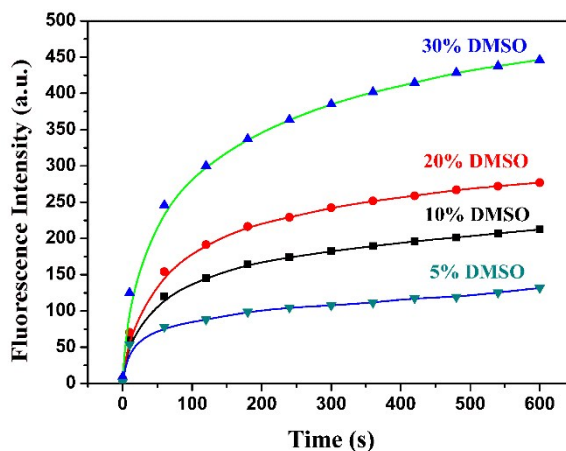

**Fig. S7.** Time dependent fluorescence spectra of Probe 1 (10  $\mu$ M) in the presence of PhSH (50  $\mu$ M) in different DMSO/HEPES buffer solution (30/70, 20/80, 10/90, 5/95, pH = 7.4, 50 mM).  $\lambda_{\text{ex}}$  = 454 nm.

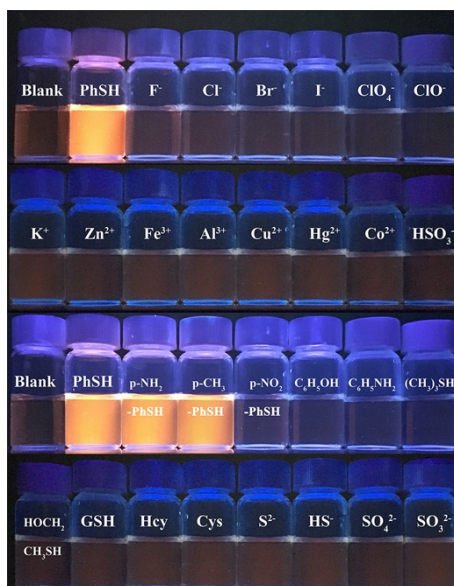

**Fig. S8.** Color changes of Probe **1** upon addition of different species under UV light (365 nm).

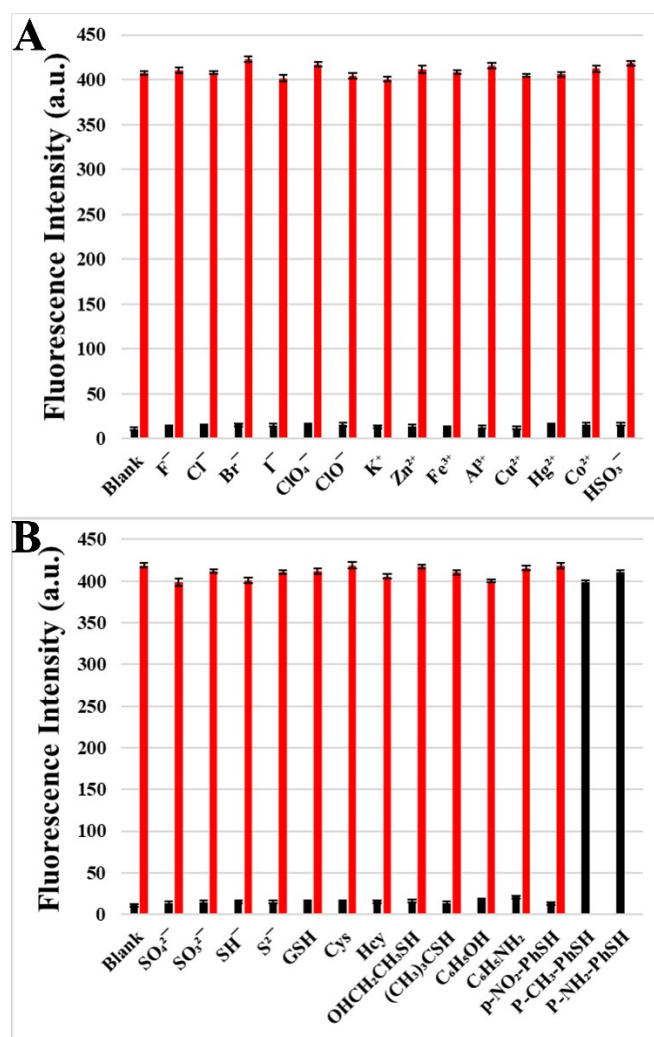

**Fig. S9.** Fluorescence responses of Probe **1** (10  $\mu$ M) at 613 nm toward thiolphenol (20  $\mu$ M) in the presence of some competitive species (100  $\mu$ M) in DMSO–HEPES (V/V = 3 : 7, 50 mM, pH 7.4) solution.  $\lambda_{\text{ex}}$  = 454 nm.

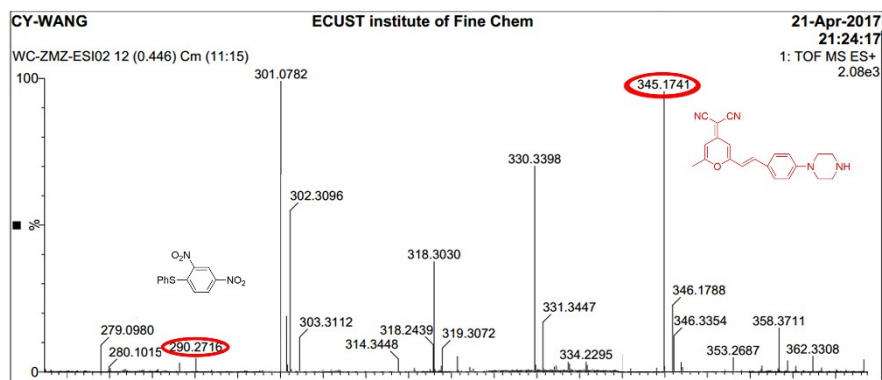

**Fig. S10.** HRMS spectrum of the reaction between Probe **1** and PhSH.

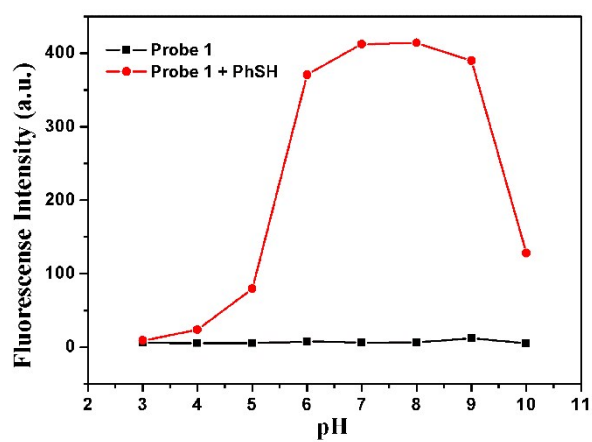

**Fig. S11.** Effect of pH on the fluorescence intensity at 613 nm of Probe **1** (10  $\mu$ M) in DMSO–HEPES (V/V = 3 : 7, 50 mM, pH 7.4) solution with (●) and without (■) PhSH (20  $\mu$ M).  $\lambda_{\text{ex}}$  = 454 nm.
